# Supplementary material for: Ascophyllan Purified from Ascophyllum nodosum Induces Th1 and Tc1 Immune Responses by Promoting Dendritic Cell Maturation
Source: Mar Drugs. 2014 Jul 14;12(7):4148–64. doi: 10.3390/md12074148 (PMC4113820; doi:10.3390/md12074148)

## Supplementary Information

**Figure S1.** Effect of ascophyllan in apoptosis and migration of DCs in peripheral tissue. Ascophyllan was injected into mice described in Figure 4. **(A)** Apoptotic cells were measured in spleen; **(B)** Percentage of lineage<sup>−</sup>CD11c<sup>+</sup> DCs in mesenteric lymph node (mLN), lung and liver were analyzed by flow cytometry; **(C)** Absolute numbers of tissue DCs are shown. Data are representative of six samples from two independent experiments.

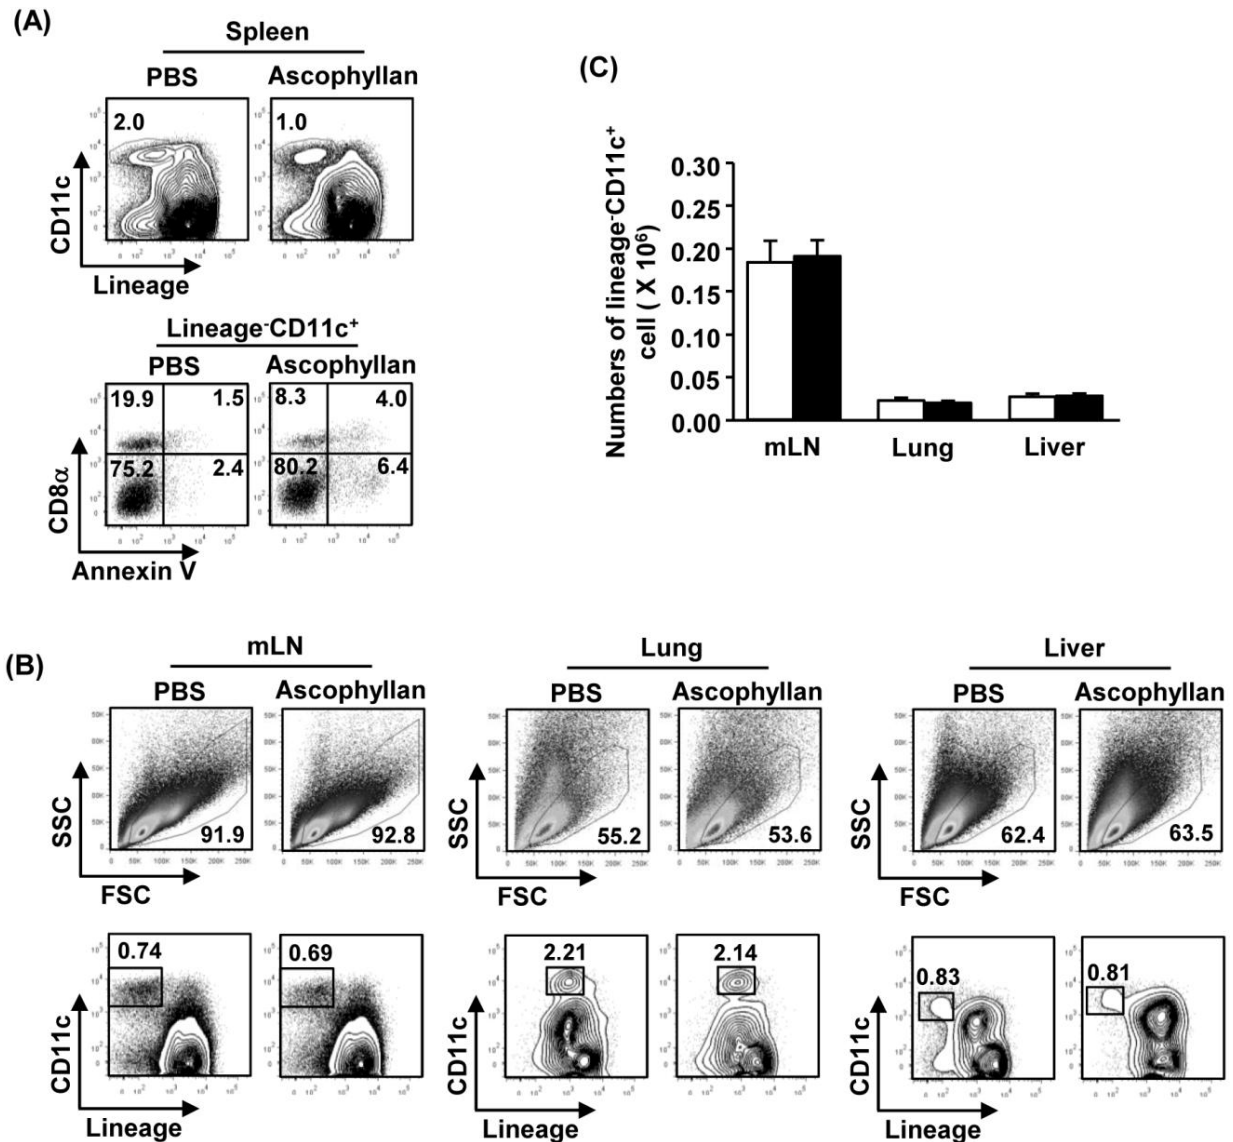

Supplement: Supplementary File 1 — Supplementary Information (PDF, 234 KB) [file marinedrugs-12-04148-s001.pdf]
